# Supplementary material
Source: Research Square preprint supplement (doi:10.21203/rs.3.rs-9468966/v1)
Supplement: Supplementary file 1 [file 9362c632bf626c74dc364e1a.pdf]

# Supplementary Information

## Impedance microscopy for imaging solid-state battery interfaces

Yuji Yamagishi\*, Hirotada Gamo, Zyun Siroma, Naoya Ishida, Yasushi Maeda, Tetsu Kiyobayashi, Nobuhiko Takeichi, Kentaro Kuratani, Hikaru Sano

Research Institute of Electrochemical Energy, Department of Energy and Environment, National Institute of Advanced Industrial Science and Technology (AIST), 1-8-31 Midorigaoka, Ikeda, Osaka 563-8577, Japan

\*Corresponding Author: Y.Y. [y.yamagishi@aist.go.jp](mailto:y.yamagishi@aist.go.jp)

11

12

## Table of contents

13 • Supplementary Note 1.

14 • Supplementary Table 1.

15 • Supplementary Note 2.

16 • Supplementary Note 3.

17 • Supplementary Figure 1.

18 • Supplementary Figure 2.

19 • Supplementary Figure 3.

20 • Supplementary Figure 4.

21 • Supplementary Figure 5.

22 • Supplementary Figure 6.

23 • Supplementary Figure 7.

24 • Supplementary Figure 8.

25

## 26 **Supplementary Note 1**

### 27 *Principle and implementation of EIS-AFM*

28 SIM visualizes the spatial distribution of AC potentials in a sample by measuring the amplitude  
29 and phase of the electrostatic force between a conductive probe and the sample. Early  
30 implementations of SIM employed an amplitude-modulation (AM) scheme for electrostatic force  
31 detection, which allows relatively high measurement frequencies<sup>1,2</sup>. However, this approach  
32 suffers from limited spatial resolution because the detected signal includes not only the  
33 electrostatic force between the probe apex and the sample but also parasitic contributions arising  
34 from the cantilever beam.

35 To suppress these non-local contributions, it is preferable to detect sideband components  
36 generated by the modulation of the probe vibration by the applied AC signal, rather than directly  
37 detecting the electrostatic force at the same frequency as the applied signal, as in the AM scheme  
38 (Supplementary Fig. 1). Based on this concept, frequency-modulation SIM (FM-SIM) was  
39 developed, which significantly improves spatial resolution<sup>3</sup>. In FM-SIM, a low-frequency AC  
40 signal (typically a few kHz) is applied to the sample, and the resulting sideband component  
41 appearing near the first resonance frequency of the cantilever is detected using an FM detector.  
42 This method selectively detects the localized electrostatic force at the probe apex.

43 Despite this advantage, the FM scheme imposes a limitation on the accessible measurement  
44 frequency. The frequency of the applied AC signal is constrained by the bandwidth of the FM  
45 detector, which typically allows detection only up to 5 kHz. As a result, SIM measurement at  
46 higher frequencies has remained difficult.

47 This limitation can be overcome by introducing a heterodyne detection scheme for electrostatic  
48 force measurements in SIM. The heterodyne approach enables detection of sideband components  
49 generated by high-frequency AC signals (>5 kHz) applied to the sample<sup>4</sup>. Because the signal of  
50 interest is still encoded in the sideband component of the first cantilever resonance as in the FM  
51 scheme, high spatial resolution is preserved while extending the accessible measurement  
52 frequency range (Supplementary Table 1). Furthermore, because the signal is detected at the  
53 second resonance frequency of the cantilever in the heterodyne scheme, the larger amplitude gain  
54 enables more sensitive detection than in the FM scheme.

55 In heterodyne electrostatic force detection, an AC signal whose frequency is determined by the  
56 cantilever resonance frequencies is applied to the sample. Specifically, the excitation frequency  
57 is set to the difference between the second and first resonance frequencies of the cantilever,

58 
$$f_1 - f_0$$

59 (Supplementary Fig. 1).

60 However, SIM measurements require sweeping the sample excitation frequency over several  
61 orders of magnitude. Direct detection of this signal using the heterodyne scheme is therefore not  
62 feasible. To address this issue, the frequency of the sample AC signal is converted into a  
63 frequency compatible with heterodyne detection. In practice, an additional AC signal is applied  
64 to the probe for frequency conversion. The mixed-frequency component generated by the  
65 interaction between this signal and the sample excitation signal is tuned to match the frequency  
66 required for heterodyne detection (Details of the frequency configuration are described in  
67 Supplementary Note 2). This approach enables heterodyne electrostatic force detection to be  
68 implemented in broadband SIM measurements.

69

|                       | <b>AM-SIM</b>     | <b>FM-SIM</b>  | <b>EIS-AFM</b>                 |
|-----------------------|-------------------|----------------|--------------------------------|
| Spatial resolution    | Low               | High           | High                           |
| Upper frequency limit | High<br>(440 kHz) | Low<br>(5 kHz) | High<br>(no fundamental limit) |
| Ref.                  | 1,2               | 3,5            | This work                      |

70 **Supplementary Table 1** | Characteristics of different SIM detection schemes. The upper  
71 frequency limit was calculated for a cantilever with a first resonance frequency of 70 kHz and a  
72 second resonance frequency of 440 kHz, assuming an FM detector bandwidth of 5 kHz.

73

## 74 **Supplementary Note 2**

### 75 *Frequency configuration of EIS-AFM*

76 As described in Supplementary Note 1, heterodyne detection is implemented in SIM by  
77 converting the sample AC signal into a frequency component that can be detected at the  
78 cantilever resonance. This section describes the detailed frequency configuration used in the  
79 measurements.

80 In the SIM measurements, a DC bias equal to the open-circuit voltage of the battery is applied to  
81 the sample, on which an AC signal at the measurement frequency  $f_s$  is superimposed. The probe  
82 is driven with three electrical components: an AC signal at frequency  $f_{t1}$  for KPFM, a DC  
83 feedback voltage, and an AC signal at frequency  $f_{t2}$  for SIM signal detection.

84 The SIM measurement determines the spatial distribution of the amplitude and phase of the AC  
 85 potential at frequency  $f_s$ . In this work, the  $f_s$  component is detected indirectly through frequency  
 86 mixing with the probe-applied signal at  $f_{t2}$ . The resulting mixed component is designed to match  
 87 the difference between the second and first resonance frequencies of cantilever. For low  
 88 measurement frequencies ( $f_s < f_1 - f_0$ ), the sum-frequency component

89 
$$f_s + f_{t2}$$

90 is tuned to equal the resonance difference

91 
$$f_1 - f_0$$

92 giving

93 
$$f_{t2} = f_1 - f_0 - f_s$$

94 For higher measurement frequencies ( $f_s > f_1 - f_0$ ), the difference-frequency component

95 
$$f_s - f_{t2}$$

96 is adjusted to match

97 
$$f_1 - f_0$$

98 yielding

99 
$$f_{t2} = f_s - f_1 + f_0$$

100 Under these conditions, the electrostatic force component carrying the  $f_s$  information appears at  
 101 the second cantilever resonance  $f_1$ . This component is detected using a lock-in amplifier,  
 102 allowing the amplitude and phase of the  $f_s$  signal to be extracted. This configuration enables  
 103 broadband SIM measurements while maintaining nearly constant detection sensitivity, because  
 104 the mixed-frequency component can always be aligned with the cantilever resonance by  
 105 adjusting  $f_{t2}$ .

106 In addition to this configuration, referred to as the low-f modes, an alternative high-f mode is  
 107 possible. In this case, the other difference-frequency component

108 
$$f_{t2} - f_s$$

109 is matched to

110 
$$f_1 - f_0$$

111 giving

112 
$$f_{t2} = f_s + f_1 - f_0$$

113 The high-f mode does not require switching between frequency conditions depending on  $f_s$ .  
114 However, it requires significantly higher  $f_{t2}$  frequencies, which introduces high-frequency  
115 signals into the probe circuitry (Supplementary Fig. 2). For practical measurements, the low-f  
116 modes are therefore preferable. All measurements in this study were performed using the low-f  
117 modes configuration.

118 Simultaneous KPFM measurements were performed to improve the accuracy of the SIM  
119 measurements. In KPFM, the probe potential is feedback-controlled to match the local surface  
120 potential of the sample, thereby suppressing undesired electrostatic forces between the probe and  
121 sample. The KPFM measurement employs a conventional frequency-modulation scheme. An AC  
122 signal at frequency  $f_{t1}$  modulates the first cantilever resonance, and the resulting sideband signal  
123 is detected using an FM detector. The output is demodulated with a lock-in amplifier and used to  
124 adjust the DC bias applied to the probe, allowing the surface potential to be determined.  
125 Simultaneous SIM–KPFM measurements have been reported previously and therefore do not  
126 represent a methodological novelty in this work<sup>3,5</sup>.

127

### 128 **Supplementary Note 3**

#### 129 *Measurement and analysis of partial impedance spectra of RC circuits using EIS-AFM*

130 For the measurement of partial impedance spectra of RC circuits using EIS-AFM, a  
131 measurement setup employing Au electrodes was constructed, as shown in Fig. 4a. Using this  
132 setup, the partial impedances of an RC circuit consisting of resistors and a capacitor ( $Z_1$  and  $Z_2$ )  
133 were extracted. The procedure for deriving the partial impedances is described below.

#### 134 Measurement procedure

- 135 1. The frequency response of the SIM signal was measured on an Au electrode to which the  
136 AC excitation signal was directly applied (reference measurement).
- 137 2. The frequency responses of the SIM signal and the current were measured on an Au  
138 electrode connected to the intermediate node of the RC circuit (main measurement).

#### 139 Calculation procedure

- 140 1. The total circuit impedance ( $Z_{\text{all}}$ ) was calculated from the measured frequency responses  
141 of the applied AC signal and the current using the same procedure as in conventional EIS.
- 142 2. The frequency dependence of the AC potential at the intermediate node of the RC circuit  
143 was obtained by multiplying the applied AC signal by the frequency-dependent intensity  
144 ratio of the SIM signals obtained in the reference and main measurements. The partial  
145 impedance  $Z_1$  was then calculated by dividing this result by the measured frequency  
146 response of the current.
- 147 3. The second partial impedance  $Z_2$  was calculated by subtracting  $Z_1$  from  $Z_{\text{all}}$ .

148 The measured frequency response of the current and the partial impedance spectra obtained  
149 using SIM are shown in Fig. 4 and Supplementary Fig. 7. Measurements were performed under  
150 two conditions with different cutoff frequencies of the RC circuit: a low cutoff frequency  
151 condition ( $R_1 = 2 \text{ k}\Omega$ ,  $R_2 = 10 \text{ k}\Omega$ ,  $C = 0.5 \text{ }\mu\text{F}$ , cutoff frequency = 32 Hz) and a high cutoff  
152 frequency condition ( $R_1 = 2 \text{ k}\Omega$ ,  $R_2 = 10 \text{ k}\Omega$ ,  $C = 0.01 \text{ }\mu\text{F}$ , cutoff frequency = 1.6 kHz). The  
153 measurement frequency range was 0.1 Hz to 1 MHz.

154 The resulting Nyquist plots show that, regardless of the cutoff frequency of the RC circuit,  $Z_1$   
155 corresponds to a resistive component of 2 k $\Omega$ , while  $Z_2$  appears as a semicircle corresponding to  
156 a parallel connection of a 10 k $\Omega$  resistor and a capacitor. These results demonstrate that the  
157 proposed SIM method enables acquisition of impedance spectra over a wide frequency range  
158 spanning seven orders of magnitude (0.1 Hz–1 MHz). Furthermore, the circuit parameters can be  
159 estimated from the obtained spectra.

160

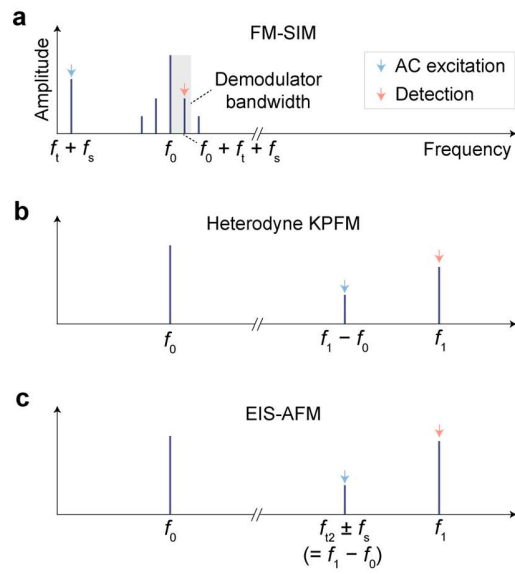

**Supplementary Fig. 1** | Comparison of the cantilever frequency spectra for different measurement methods based on distinct electrostatic force detection schemes. **a**, Frequency modulation (FM) SIM. **b**, Heterodyne KPFM. **c**, EIS-AFM.

161

162

163

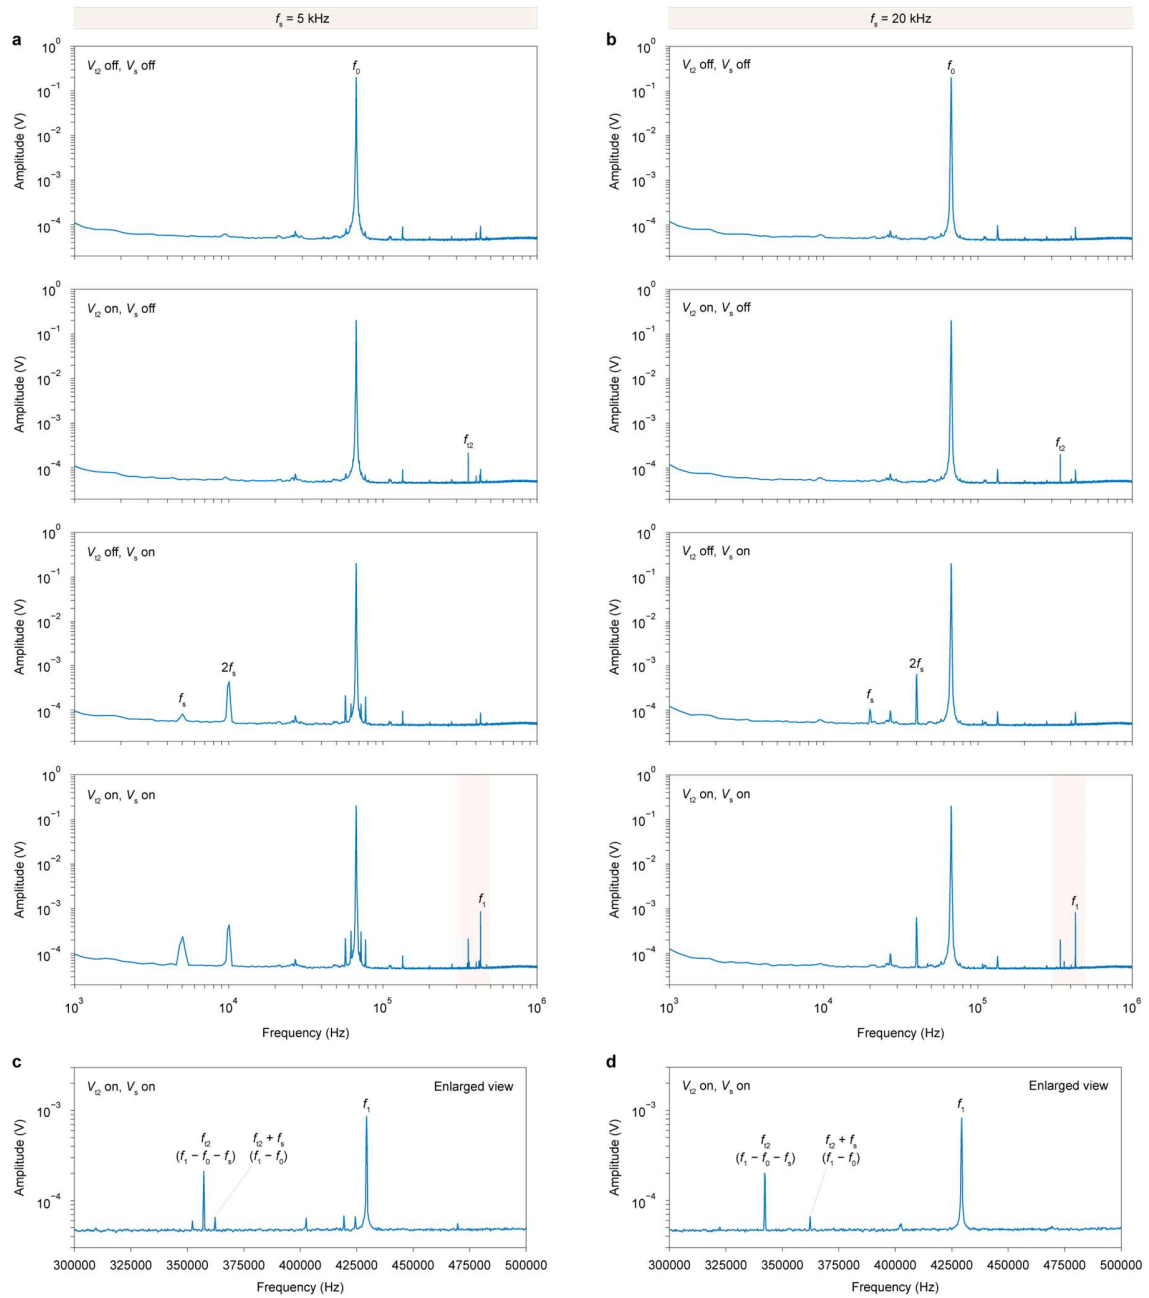

**Supplementary Fig. 2 | Comparison of the cantilever vibration spectra obtained with different on/off combinations of the AC signals applied to the tip and sample.**  $V_{12}$  and  $V_s$  denote the amplitudes of the AC signals with frequencies  $f_{12}$  and  $f_s$  applied to the tip and sample, respectively. **a**, Spectra for  $f_s = 5$  kHz. **b**, Spectra for  $f_s = 20$  kHz. **c-d**, Enlarged views of the spectra near the second resonance mode for the  $V_{12}$  on,  $V_s$  on condition in **a** and **b**, respectively. To reduce unwanted peaks, the KPFM voltage feedback was held during the measurements, and the AC signal applied to the tip for KPFM was turned off.

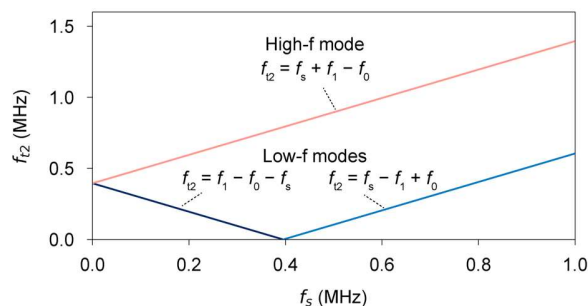

**Supplementary Fig. 3 | Relationship between the frequencies of the AC signals applied to the sample and the probe in EIS-AFM.** In the high-f mode, the frequencies follow a single relationship, although the required value of  $f_{t2}$  becomes large. In contrast, in the low-f modes, two relationships must be switched, but  $f_{t2}$  can be kept small. Unless otherwise noted, all measurements in this study were performed using the low-f modes.

164

165

166

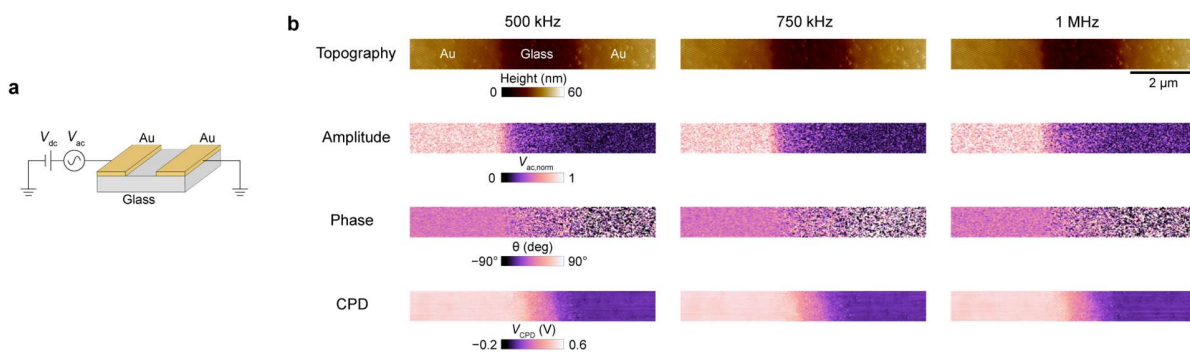

**Supplementary Fig. 4 | High-frequency EIS-AFM measurement results using an Au electrode sample.** **a**, Schematic illustration of the test measurement. **b**, SIM measurement results obtained when the frequency of the AC signal applied to the sample was set to 500 kHz, 750 kHz, and 1 MHz. The topography, SIM amplitude and phase, and CPD images obtained by KPFM are shown. The AC signal was applied to the Au electrode on the left side of the image.

167

168

169

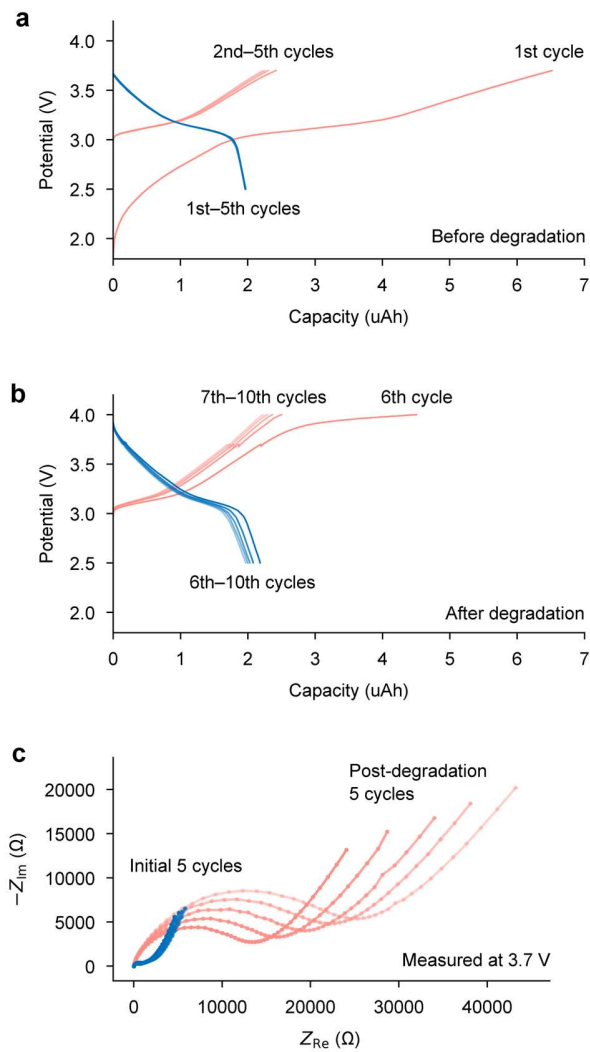

**Supplementary Fig. 5 | High-voltage degradation of the NCM cathode cell.** **a**, Charge–discharge curves for cycles 1–5. **b**, Charge–discharge curves for cycles 6–10 after increasing the charge cutoff voltage to 4 V (vs. InLi). **c**, Nyquist plots measured at each cycle. The cell potential during all EIS measurements was 3.7 V.

170

171

172

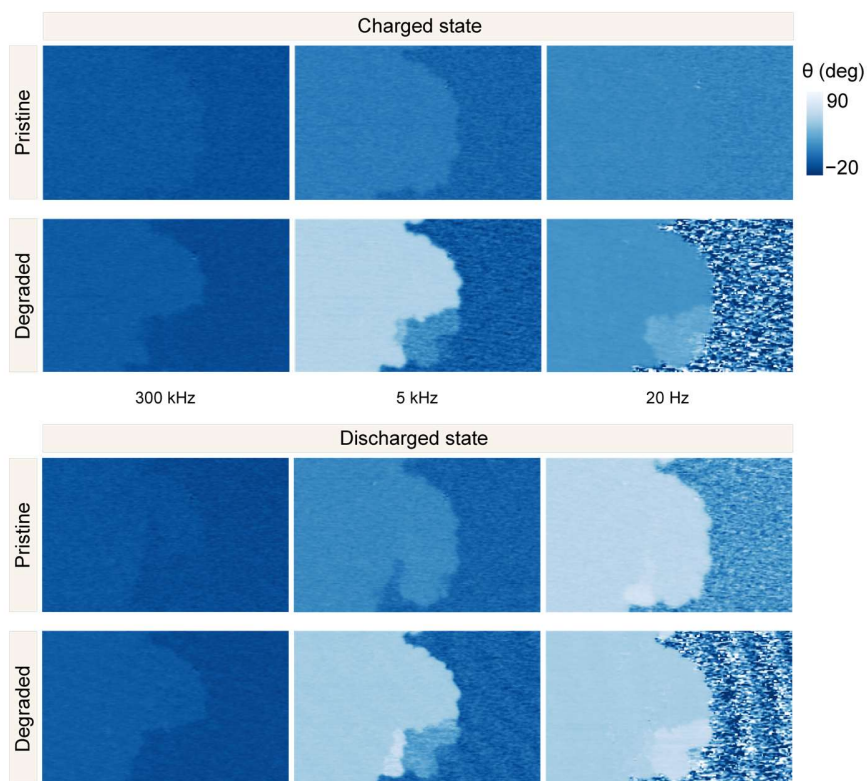

**Supplementary Fig. 6 | Phase images from EIS-AFM measurements of high-voltage degradation near the NCM particle/sulfide SE interface.** Results obtained at three frequencies (300 kHz, 5 kHz, and 20 Hz) are shown for both the charged and discharged states before and after high-voltage degradation.

173

174

175

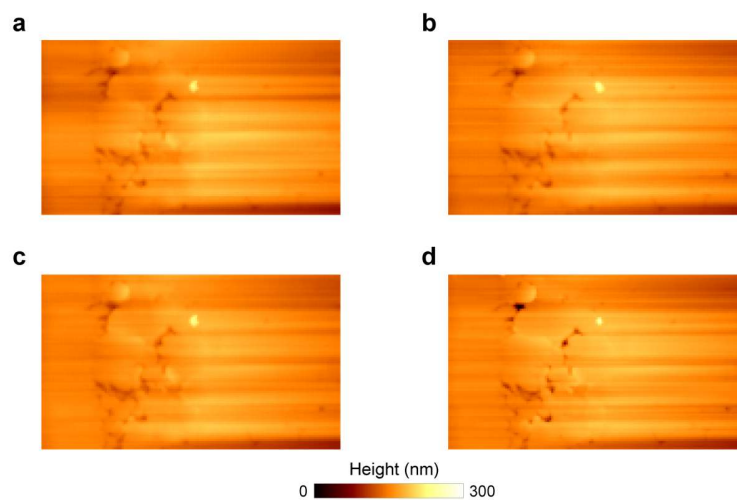

**Supplementary Fig. 7 | Topographic images during a series of EIS-AFM measurements near the NCM cathode/sulfide SE interface. a,** Charged state (3.4 V) before high-voltage degradation. **b,** Discharged state (2.5 V) before high-voltage degradation. **c,** Charged state after high-voltage degradation induced by holding the cell at 4.8 V (vs. Li/Li<sup>+</sup>) for 24 h. **d,** Discharged state after the high-voltage degradation.

176

177

178

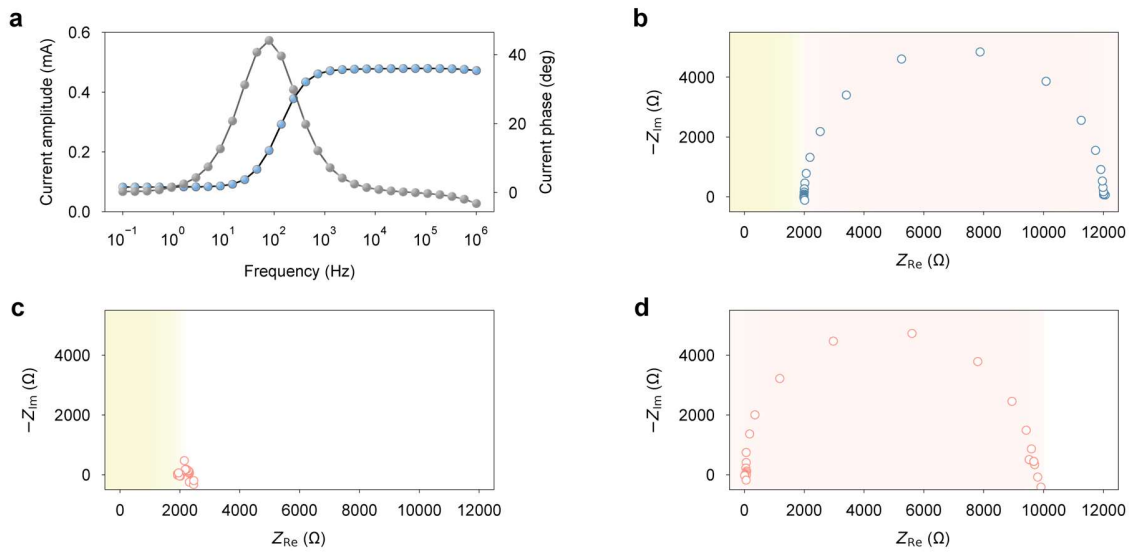

**Supplementary Fig. 8 | Measurement of partial impedance spectra by EIS-AFM. a,** Frequency spectra of the current amplitude and phase for the RC circuit used in the test measurement ( $R_1 = 2 \text{ k}\Omega$ ,  $R_2 = 10 \text{ k}\Omega$ ,  $C = 0.5 \text{ }\mu\text{F}$ ; cutoff frequency = 32 Hz). **b,** Nyquist plot of the total impedance of the entire circuit. **c-d,** Nyquist plots of the partial impedances ( $Z_1$  and  $Z_2$ ) of the RC circuit extracted from SIM measurement.

179

180

181

182 **References**

- 183 1. Kalinin, S. V. & Bonnell, D. A. Scanning impedance microscopy of electroactive  
184 interfaces. *Appl. Phys. Lett.* **78**, 1306–1308 (2001).
- 185 2. Kalinin, S. V. & Bonnell, D. A. Scanning impedance microscopy of an active Schottky  
186 barrier diode. *J. Appl. Phys.* **91**, 832–839 (2002).
- 187 3. Kimura, T., Kobayashi, K. & Yamada, H. Local impedance measurement of an  
188 electrode/single-pentacene-grain interface by frequency-modulation scanning impedance  
189 microscopy. *J. Appl. Phys.* **118**, 055501 (2015).
- 190 4. Sugawara, Y. *et al.* High potential sensitivity in heterodyne amplitude-modulation Kelvin  
191 probe force microscopy. *Appl. Phys. Lett.* **100**, 223104 (2012).
- 192 5. Ishida, N. Local impedance measurement by direct detection of oscillating electrostatic  
193 potential using Kelvin probe force microscopy. *Journal of Physical Chemistry C* **126**,  
194 17627–17634 (2022).

195
